# Supplementary material
Source: publisher figshare collection journal article supplement (https://tandf.figshare.com/ndownloader/files/43127745)
Supplement: Supplementary file 1 [file 43127745]

**Wintering and migration strategies of Slavonian Grebes *Podiceps auritus* breeding in Iceland**

Thorkell Lindberg Thórarinsson1, Benjamin Merkel2, Adalsteinn Orn Snaethórsson1 and Yann Kolbeinsson1

1Northeast Iceland Nature Research Centre, Hafnarstétt 3, 640 Húsavík, Iceland

2Akvaplan - niva AS, Fram Centre, NO - 9296 Tromsø, Norway

Corresponding author: E-mail: lindi@nna.is

Supplementary material


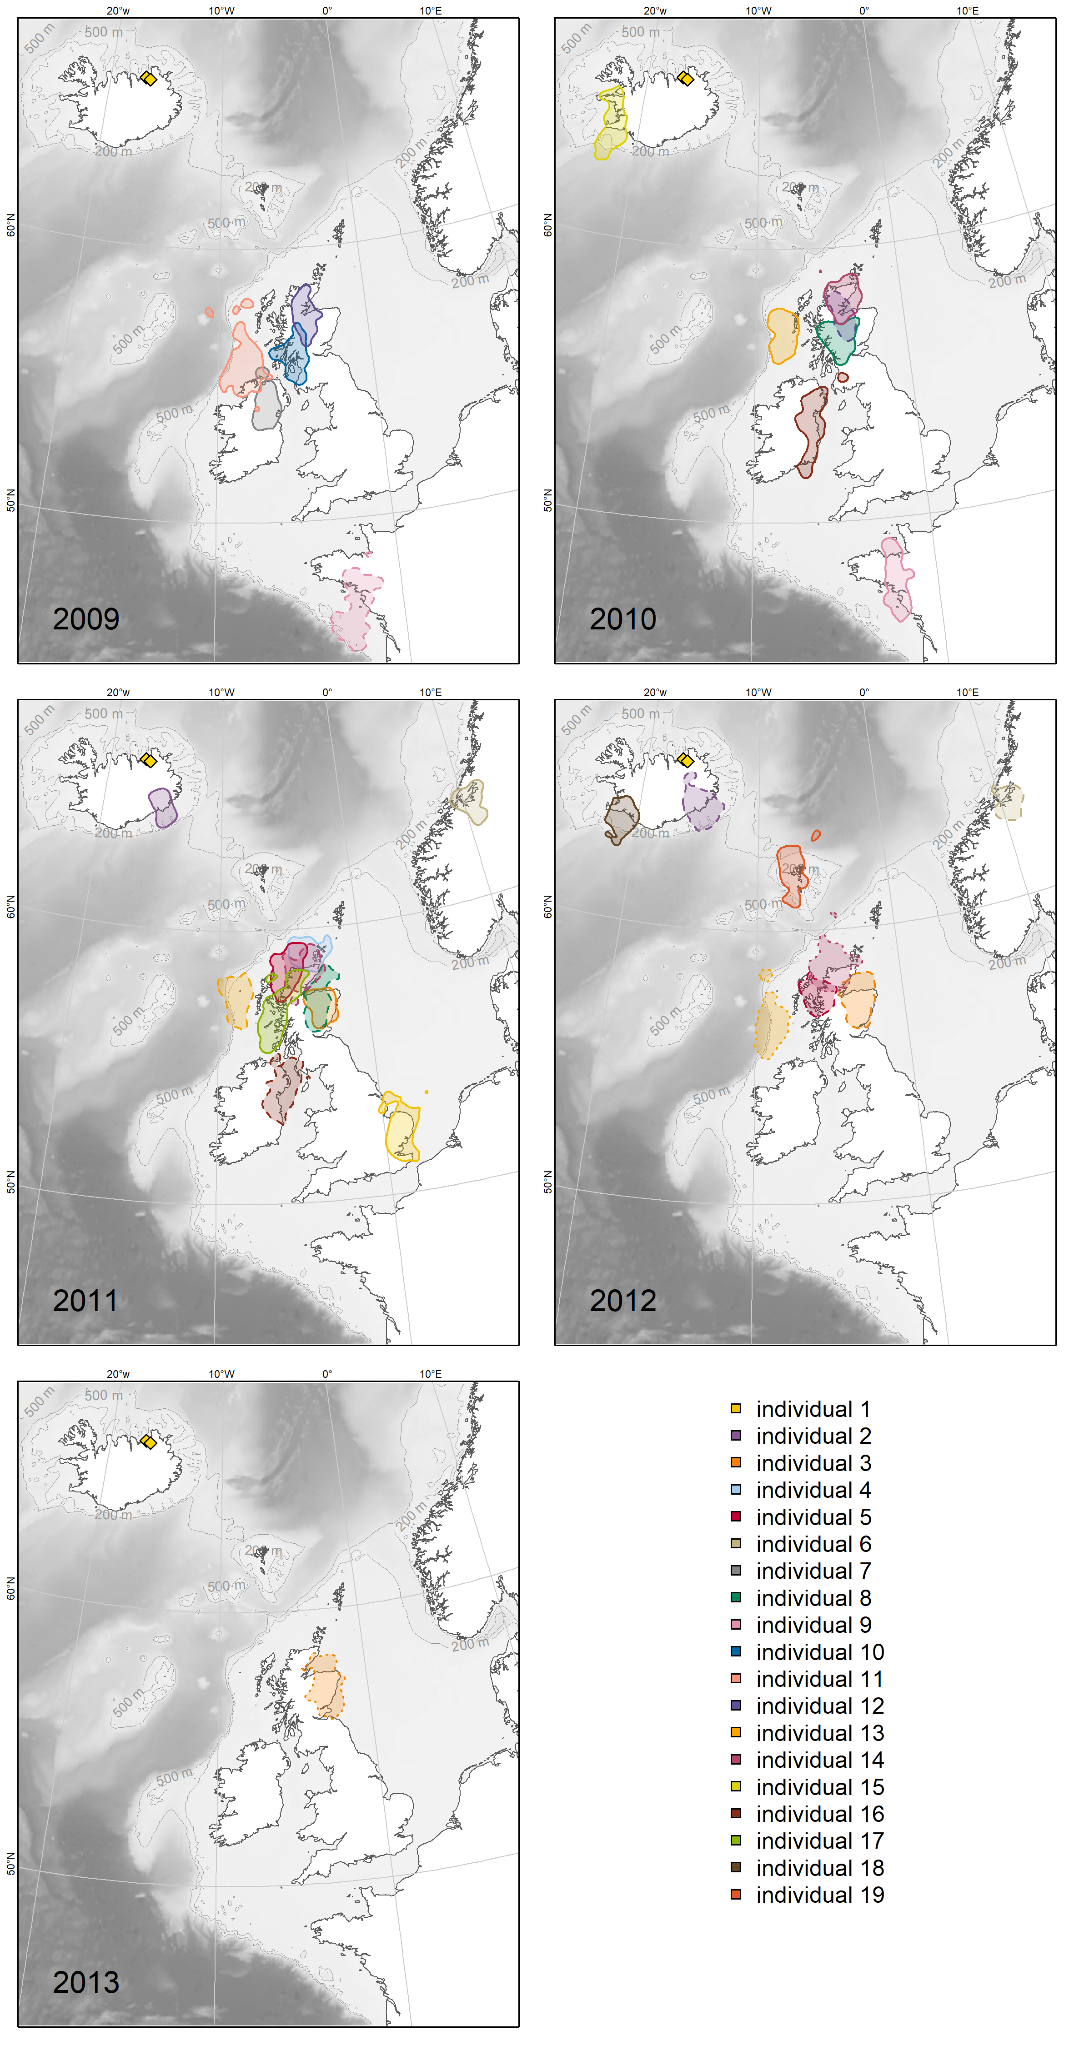


**Figure S1.** Individual wintering areas of 19 Slavonian Grebes nesting in Iceland (Azimuthal Equidistant projection centred on 60°N and 9°W). All shapes depict individual 75% kernel contours during mid-Winter (December and January). Different colours illustrate different individuals. Data from each winter 2009 – 2013 are shown on separate maps. Yellow diamonds show breeding sites, Lake Víkingavatn and Lake Ástjorn.


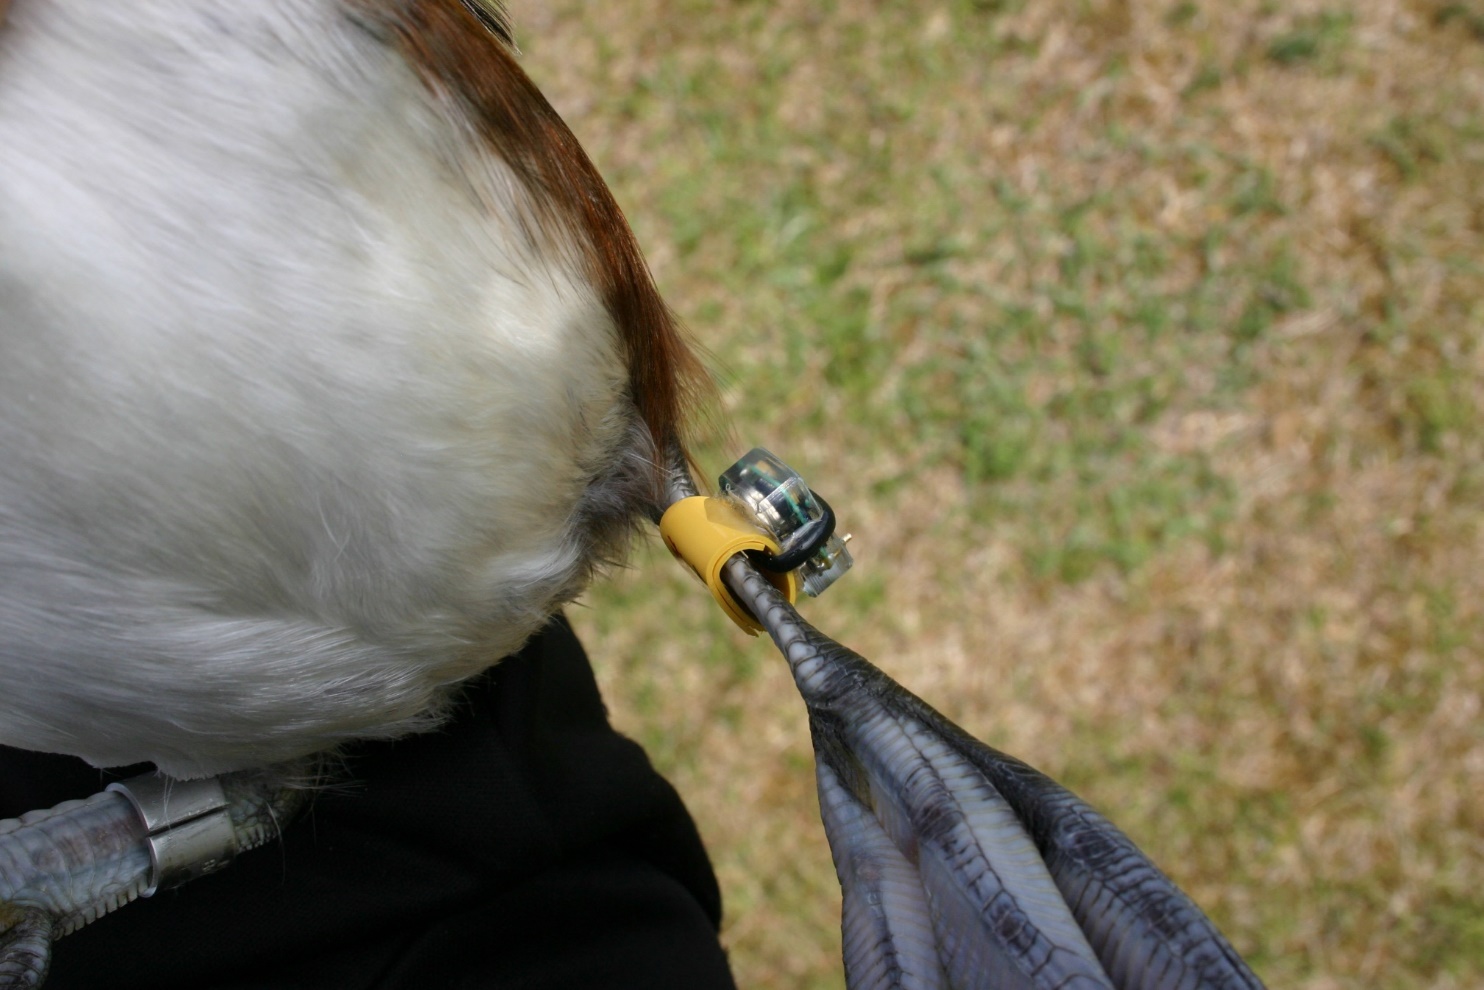


**Figure S2.** Geolocator (British Antarctic Survey Mk18) attached to a darvic ring with a cable tie and epoxy glue, attached to the tarsus of a Slavonian Grebe. Epoxy glue creates a seat for the Geolocator on the partially oval shaped darvic ring. A cable tie also keeps the Geolocator attached to the darvic ring. A numbered metal ring attached to the tarsus of the other leg.
